# Supplementary figures and images for: Microbiological Testing for the Proper Assessment of the Hygiene Status of Beef Carcasses
Source: MDPI journal article supplement (doi:10.3390/microorganisms7030086), 2019-03-19

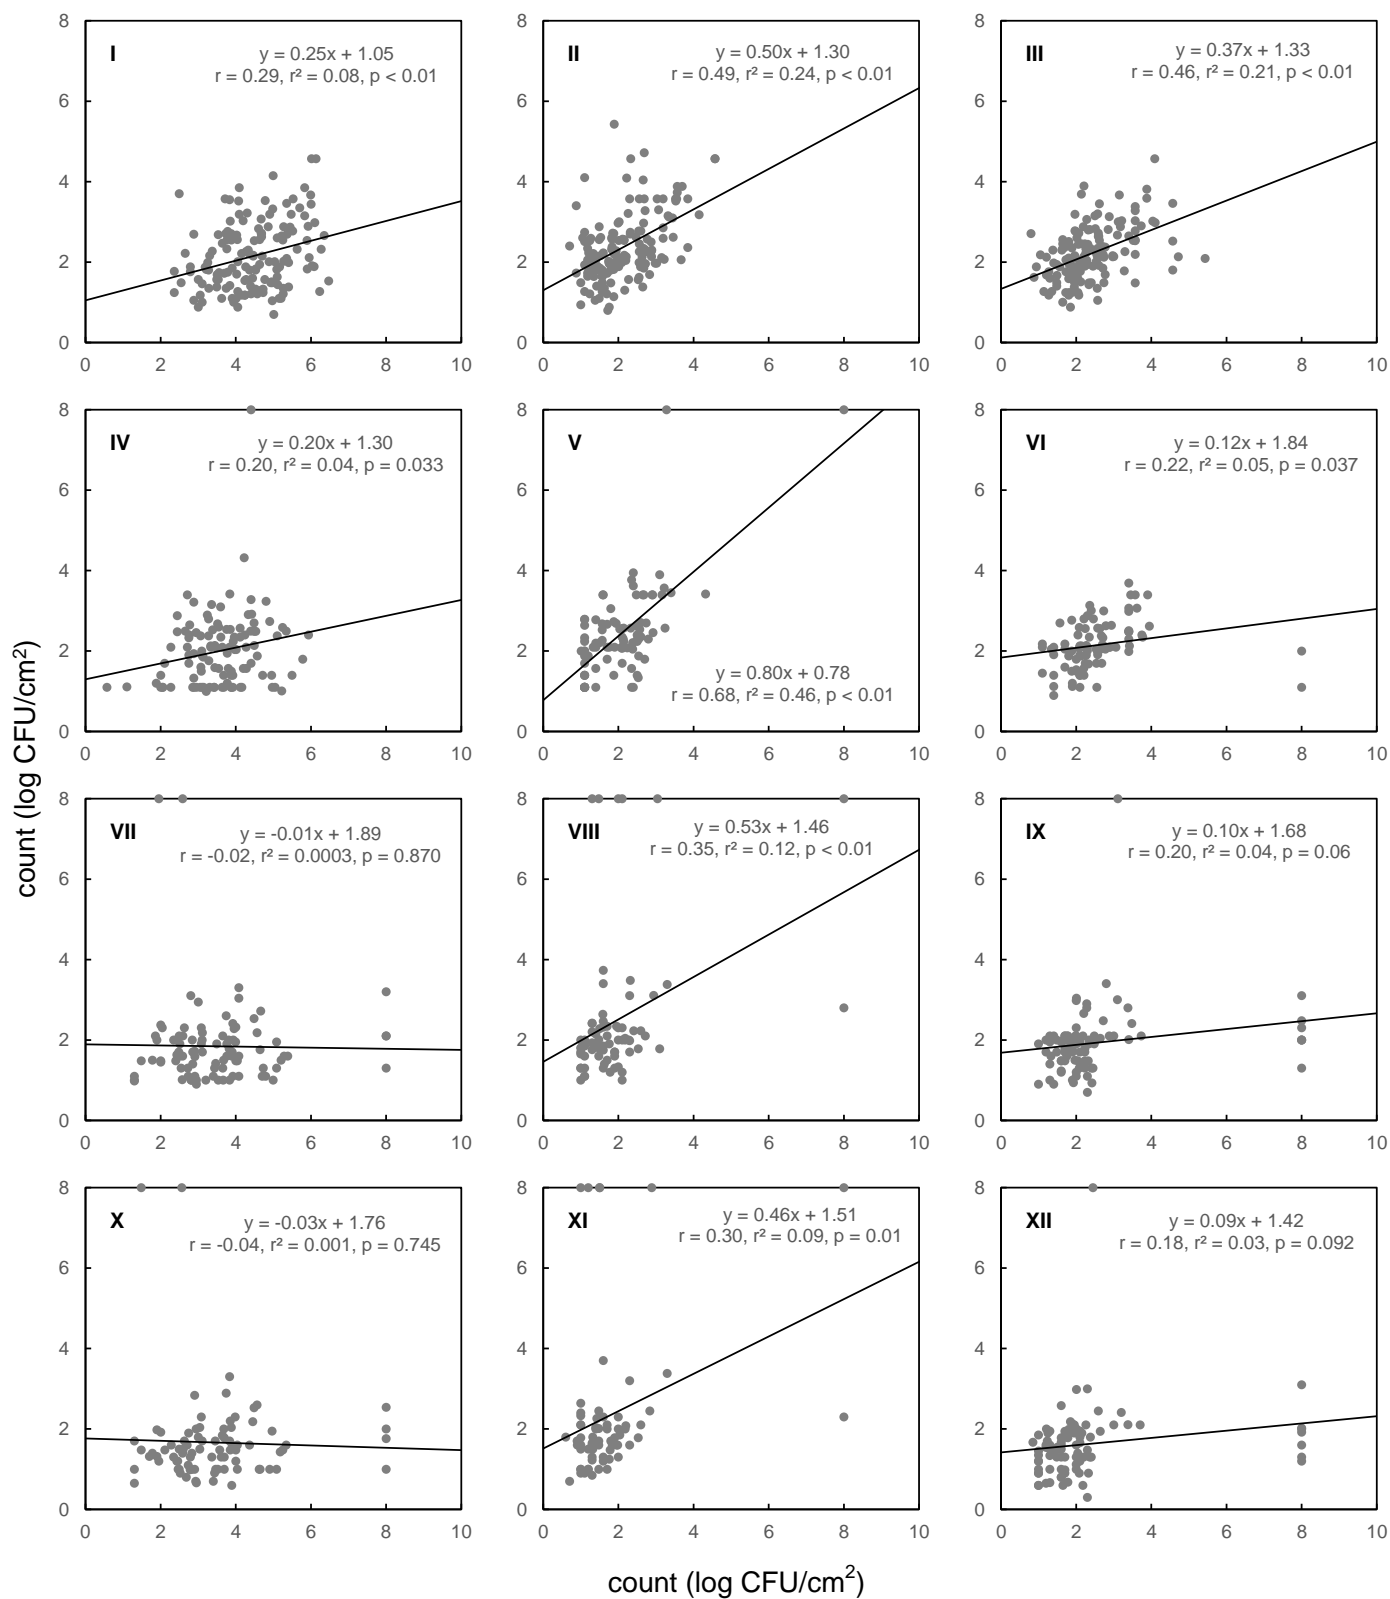

Supplementary Figure 3

Supplement: s1 [file s1]

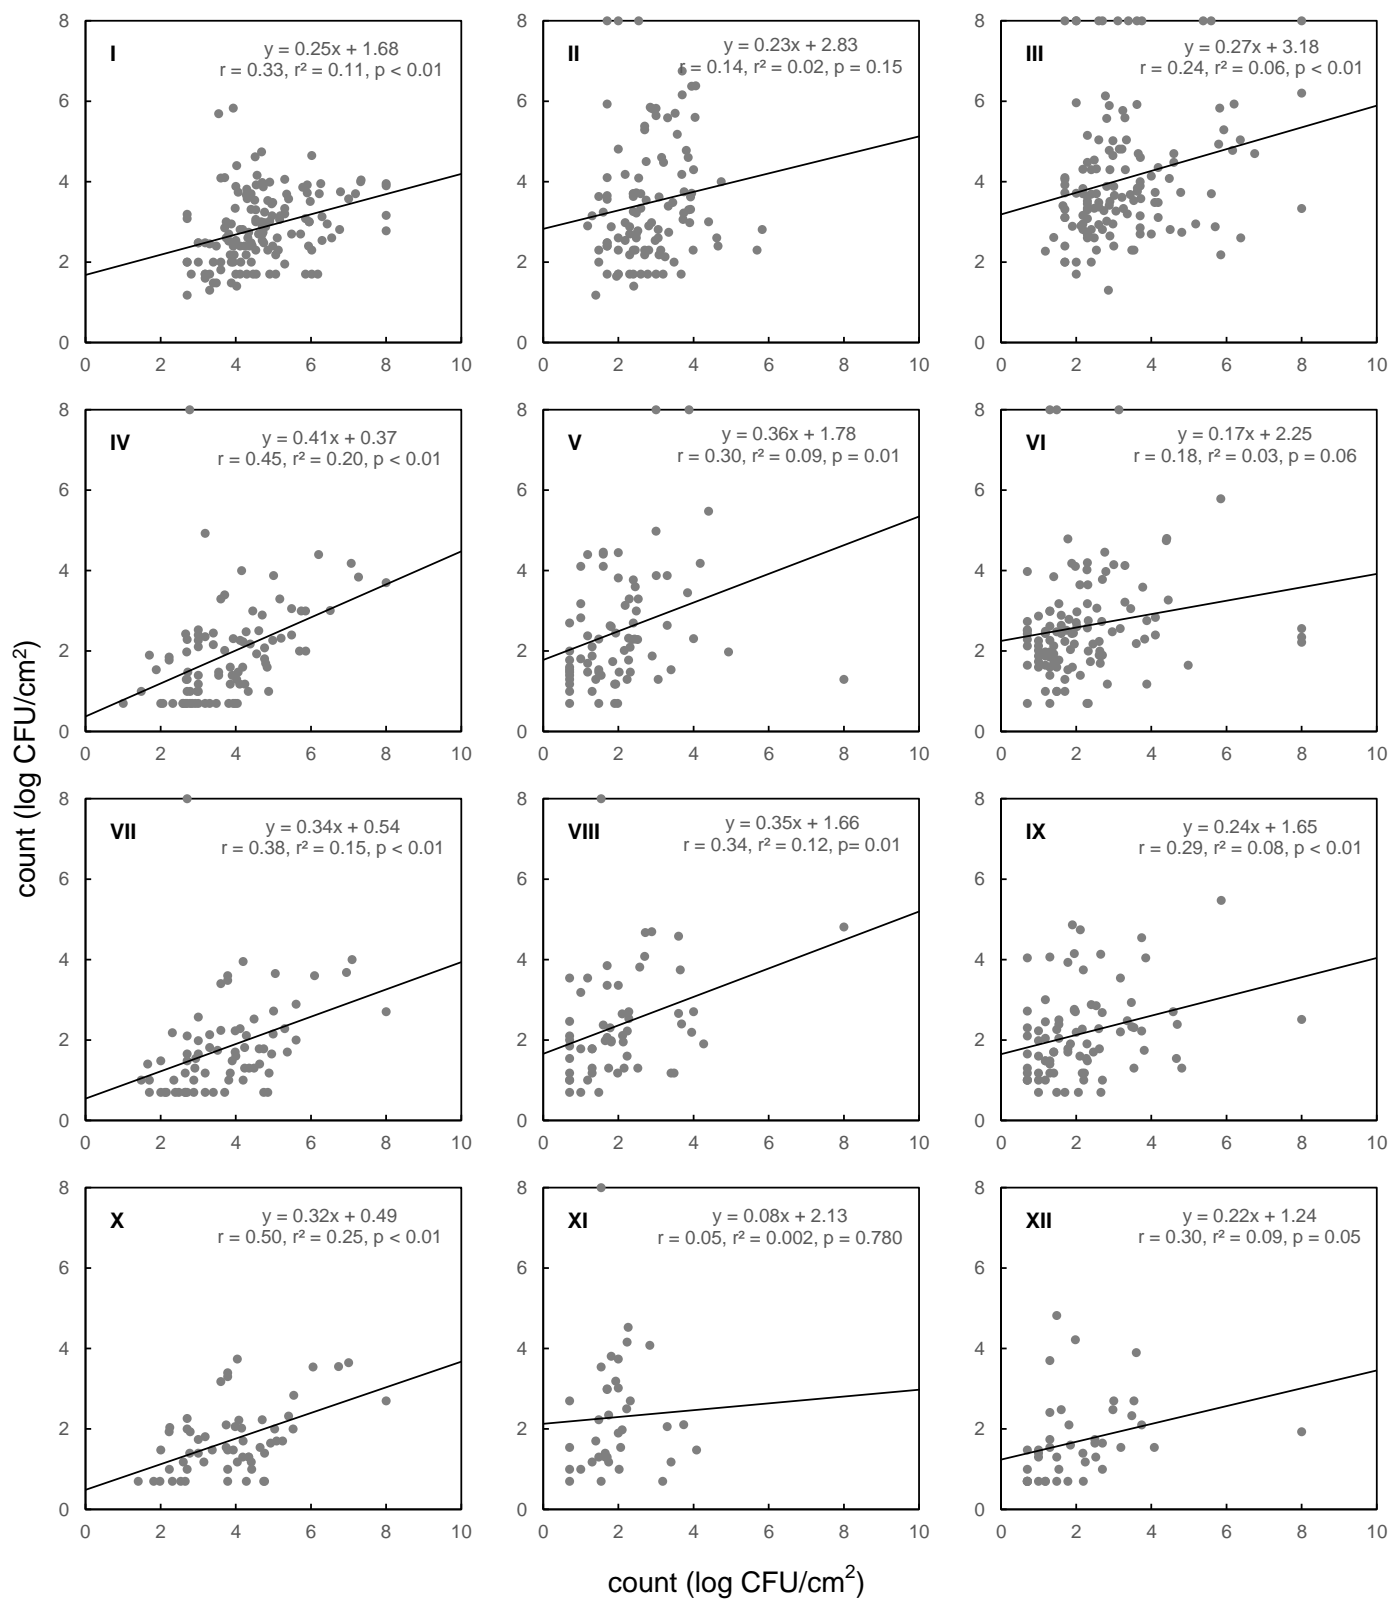

Supplementary Figure 1

Supplement: s1 [file s1]

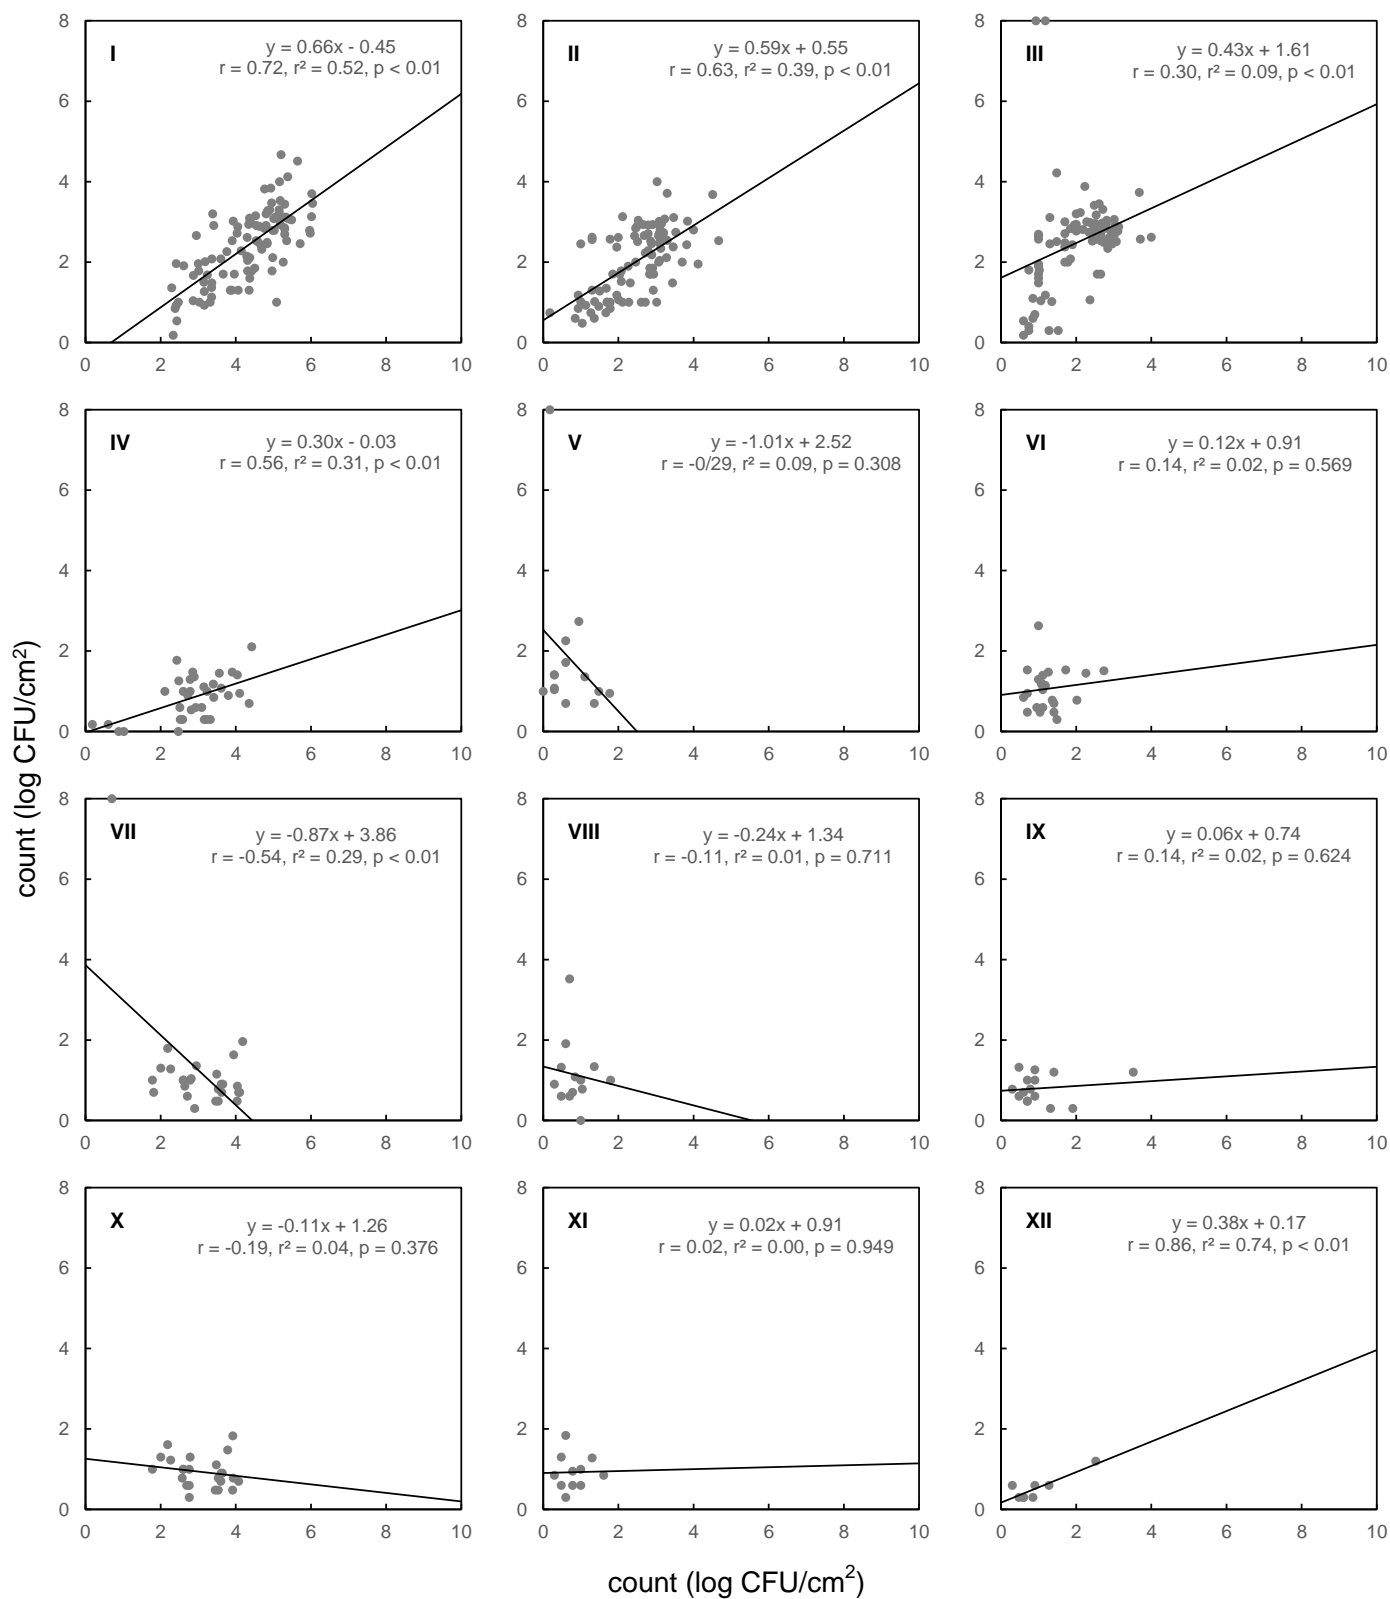

Supplementary Figure 2

Supplement: s1 [file s1]
